# Supplementary material
Source: MDPI journal article supplement (https://www.mdpi.com/2071-1050/15/17/13271)
Supplement: s1 [file s1]

## Supplemental Information

## Articles Selected for the Study (3 No. Subsets)

## Subset 1 – Primary Database references (ProQuest, Scopus, Web of Science, EBSCO)

1. Barthel, S.; Folke, C.; Colding, J. Social–ecological memory in urban gardens: Retaining capacity for management of ecosystem services. *Global Environmental Change* **2010**, *20*, 255–265, doi:10.1016/j.gloenvcha.2010.01.001.
2. Blanco, E.; Raskin, K.; Clergeau, P. Reconnecting neighbourhoods with ecosystem functioning: Analysis of solutions from six international case studies. *Sustainable Cities Soc.* **2022**, *77*, doi:10.1016/j.scs.2021.103558.
3. Casazza, M.; Liu, G.; Maglioccola, F.; Lega, M. A retrospective comparison on Europe and China ecological wisdom of pre-industrial urban communities under the lens of sustainability pillars. *J. Environ. Account. Manag.* **2020**, *8*, 365–385, doi:10.5890/JEAM.2020.012.005
4. Clementi, M.; Fontana, C. The systemic approach in sustainable environmental planning: References to the ecology of living systems. *Techne* **2019**, *17*, 143–151, doi:10.13128/Techne-24027.
5. Felson, A.J.; Pavao-Zuckerman, M.; Carter, T.; Montalto, F.; Shuster, B.; Springer, N.; Stander, E.K.; Starry, O. Mapping the Design Process for Urban Ecology Researchers. *BioScience* **2013**, *63*, 854–865, doi:10.1525/bio.2013.63.11.4.
6. Fu, X.; Wang, X.H.; Schock, C.; Stuckert, T. Ecological wisdom as benchmark in planning and design. *Landscape and Urban Planning* **2016**, *155*, 79–90, doi:10.1016/j.landurbplan.2016.06.012.
7. Herrmann, D.L.; Schwarz, K.; Shuster, W.D.; Berland, A.; Chaffin, B.C.; Garmestani, A.S.; Hopton, M.E. Ecology for the Shrinking City. *Bioscience* **2016**, *66*, 965, doi:https://doi.org/10.1093/biosci/biw062.
8. Hindley, J. A park for the 21st century: Observations on the transformation of mile end park. *Capitalism Nat. Social.* **2007**, *18*, 104–124, doi:10.1080/10455750701705153.
9. Koat, J.; Zari, M.P. Biodiver\_Cities: An exploration of how architecture and urban design can regenerate ecosystem services. In Proceedings of the 53rd International Conference of the Architectural Science Association, Roorkee, Uttarakhand, India, 28–30 November, 2019; pp. 115–124.
10. Mang, P.; Reed, B. The nature of positive. *Building Research and Information* **2015**, *43*, 7–10, doi:10.1080/09613218.2014.911565.
11. Mouritz, L.; Breedon, A. Country-Led Approaches in Land Management and Design. *Architectural Design* **2022**, *92*, 96–103, doi:https://doi.org/10.1002/ad.2778.
12. Othmani, N.I.; Mohamed, S.A.; Abdul Hamid, N.H.; Ramlee, N.; Yeo, L.B.; Mohd Yunus, M.Y. Reviewing biomimicry design case studies as a solution to sustainable design. *Environ. Sci. Pollut. Res.* **2022**, 69327–69340, doi:10.1007/s11356-022-22342-z.
13. Parivar, P.; Quanrud, D.; Sotoudeh, A.; Abolhasani, M. Evaluation of urban ecological sustainability in arid lands (case study: Yazd-Iran). *Environ. Dev. Sustain.* **2021**, *23*, 2797–2826, doi:10.1007/s10668-020-00637-w.
14. Pedersen Zari, M. A shift in architectural and urban design: cities as mediums of change. Incorporating biomimicry into regenerative design. Can built environment biomimicry address climate change? In *Regenerative Urban Design and Ecosystem Biomimicry*; Taylor and Francis: 2018; ch1-3, pp. 1–68.
15. Pedersen Zari, M. Biomimetic urban and architectural design: Illustrating and leveraging relationships between ecosystem services. *Biomimetics* **2021**, *6*, 1–16, doi:10.3390/biomimetics6010002.
16. Pickett, S.T.A.; McGrath, B.; Cadenasso, M.L.; Felson, A.J. Ecological resilience and resilient cities. *Building Research and Information* **2014**, *42*, 143–157, doi:10.1080/09613218.2014.850600.
17. Pincetl, S. Nature, urban development and sustainability - What new elements are needed for a more comprehensive understanding? *Cities* **2012**, *29*, S32–S37, doi:10.1016/j.cities.2012.06.009.
18. Rees, W.E. Is 'sustainable city' an oxymoron? *Local Environment* **1997**, *2*, 303–310, doi:10.1080/13549839708725535.
19. Robinson, J.; Cole, R.J. Theoretical underpinnings of regenerative sustainability. *Building Research and Information* **2015**, *43*, 133–143, doi:10.1080/09613218.2014.979082.
20. Rozzi, R. Biocultural Ethics: Recovering the Vital Links between the Inhabitants, Their Habits, and Habitats. *Environmental Ethics* **2012**, *34*, 27–50.
21. Schwann, A. Ecological wisdom: Reclaiming the cultural landscape of the Okanagan Valley. *J. Urban Manag.* **2018**, *7*, 172–180, doi:10.1016/j.jum.2018.05.004.
22. Steiner, F. The Wisdom of Looking Forward Through Ecological Design and Planning. In *Ecological Wisdom: Theory and Practice*, Yang, B., Young, R.F., Eds.; EcoWISE-Innovative Approaches to Socio-Ecological Sustainability; Springer-Verlag Singapore Pte Ltd: Singapore, 2019; pp. 151–173.
23. Suryantini, R.; Harahap, M.M.Y.; Yatmo, Y.A.; Putra, N. Thinking ecology for architecture: Exploration of cool pockets. In Proceedings of the 3rd International Tropical Renewable Energy Conference "Sustainable Development of Tropical Renewable Energy", Kuta, Indonesia (6–8 November 2018).
24. Tan, P.Y.; Abdul Hamid, A.R.B. Urban ecological research in Singapore and its relevance to the advancement of urban ecology and sustainability. *Landscape and Urban Planning* **2014**, *125*, 271–289, doi:10.1016/j.landurbplan.2014.01.019.
25. Tomalty, R. The ecology of cities. *Alternatives Journal* **2009**, *35*, 19–21.
26. Tutor, L. Design process of a water reclamation garden: From natural niches to urban environment. In Proceedings of the World Sustainable Built Environment - Beyond 2020, Gothenberg, Sweden, (2–4 November 2020).

27. Van der Jagt, A.P.N.; Smith, M.; Ambrose-Oji, B.; Konijnendijk, C.C.; Giannico, V.; Haase, D.; Laforteza, R.; Nastran, M.; Pintar, M.; Železnikar, Š.; et al. Co-creating urban green infrastructure connecting people and nature: A guiding framework and approach. *Journal of Environmental Management* **2019**, *233*, 757–767, doi:10.1016/j.jenvman.2018.09.083.
28. Wahl, D.C. Scale-linking design for systemic health: Sustainable communities and cities in context. *Int. J. Ecodynamics*. **2007**, *2*, 57–72, doi:10.2495/ECO-V2-N1-57-72.
29. Young, R.F. Modernity, postmodernity, and ecological wisdom: Toward a new framework for landscape and urban planning. *Landscape and Urban Planning* **2016**, *155*, 91–99, doi:10.1016/j.landurbplan.2016.04.012.
30. Young, R.F.; Lieberknecht, K. From smart cities to wise cities: ecological wisdom as a basis for sustainable urban development. *Journal of Environmental Planning & Management* **2019**, *62*, 1675–1692, doi:10.1080/09640568.2018.1484343.

## Subset 2- Google Scholar references (2018- 2022)

1. Benyus, J.; Dwyer, J.; El-Sayed, S.; Hayes, S.; Baumeister, D.; Penick, C.A. Ecological performance standards for regenerative urban design. *Sustainability Science* **2022**, *17*, 2631–2641, <https://doi.org/10.1007/s11625-022-01180-5>.
2. Blanco, E.; Pedersen Zari, M.; Raskin, K.; Clergeau, P. Urban ecosystem-level biomimicry and regenerative design: Linking ecosystem functioning and urban built environments. *Sustainability* **2021**, *13*, 404–416, <https://doi.org/10.3390/su13010404>.
3. Blanco, E.; Raskin, K.; Clergeau, P. Towards regenerative neighbourhoods: An international survey on urban strategies promoting the production of ecosystem services. *Sustainable Cities Soc.* **2022**, *80*, 11–17, doi:<https://doi.org/10.1016/j.scs.2022.103784>.
4. Camrass, K. Regenerative futures. *Foresight* **2020**, *22*, 4, 401–415 doi:<https://doi.org/10.1108/FS-08-2019-0079>.
5. Camrass, K. Urban regenerative thinking and practice: a systematic literature review. *Building Research Information* **2022**, *50*, 339–350, doi:<https://doi.org/10.1080/09613218.2021.1922266>.
6. Camrass, K. Regenerative urbanism: a causal layered analysis. *Foresight* **2022**, 1–14 (Issue ahead of print) doi:<https://doi.org/10.1108/FS-11-2021-0227>.
7. Craft, W.; Ding, L.; Prasad, D. Developing a decision-making framework for regenerative precinct development. *Sustainability* **2021**, *13*, 12604–12627, doi:<https://doi.org/10.3390/su132212604>.
8. Craft, W.; Ding, L.; Prasad, D. Understanding decision-making in regenerative precinct developments. *Journal of Cleaner Production* **2022**, *338*, 130672–130682, doi:<https://doi.org/10.1016/j.jclepro.2022.130672>.
9. Crowley, D.; Marat-Mendes, T.; Falanga, R.; Henfrey, T.; Penha-Lopes, G. Towards a necessary regenerative urban planning. Insights from community-led initiatives for ecocity transformation. *Cidades. Comunidades e Territórios* **2021**, *Sp21*, 83–104.
10. Du Plessis, C. The City Sustainable, Resilient, Regenerative—A Rose by Any Other Name? In *Design for Regenerative Cities and Landscapes*; Springer: 2022; pp. 23–48.
11. Gibbons, L.V. Regenerative—The new sustainable? *Sustainability* **2020**, *12*, 5483–5502, doi:<https://doi.org/10.3390/su12135483>.
12. Gibbons, L.V. Moving beyond sustainability: A Regenerative Community Development Framework for co-creating thriving living systems and its application. *J. Sustain. Dev.* **2020**, *13*, 20–52, doi:<https://doi.org/10.5539/jsd.v13n2p20>.
13. Gibbons, L.V.; Cloutier, S.A.; Coseo, P.J.; Barakat, A. Regenerative development as an integrative paradigm and methodology for landscape sustainability. *Sustainability* **2018**, *10*, 1910–1930, doi:<https://doi.org/10.3390/su10061910>.
14. Gibbons, L.V.; Pearthree, G.; Cloutier, S.A.; Ehlenz, M.M. The development, application, and refinement of a Regenerative Development Evaluation Tool and indicators. *Ecol. Indic.* **2020**, *108*, 105698–105715, doi:<https://doi.org/10.1016/j.ecolind.2019.105698>.
15. Hes, D.; Stephan, A.; Moosavi, S. Evaluating the practice and outcomes of applying regenerative development to a large-scale project in Victoria, Australia. *Sustainability* **2018**, *10*, 460–484. doi:<https://doi.org/10.3390/su10020460>.
16. Heymans, A.; Breadsell, J.; Morrison, G.M.; Byrne, J.J.; Eon, C. Ecological urban planning and design: A systematic literature review. *Sustainability* **2019**, *11*, 3723–3743, doi:<https://doi.org/10.3390/su11133723>.
17. Mang, P.; Reed, B. Regenerative development and design (2nd edition). *Sustainable Built Environments* **2020**, 115–141, doi:[https://doi.org/10.1007/978-1-0716-0684-1\\_303](https://doi.org/10.1007/978-1-0716-0684-1_303).
18. Pedersen Zari, M.; Hecht, K. Biomimicry for regenerative built environments: Mapping design strategies for producing ecosystem services. *Biomimetics* **2020**, *5*, 18–35.
19. Poelina, A.; Woollorton, S.; Blaise, M.; Aniere, C.L.; Horwitz, P.; White, P.J.; Muecke, S. Regeneration time: ancient wisdom for planetary wellbeing. *Australian Journal of Environmental Education* **2022**, 1–18.
20. Roös, P.B. Regenerative Design, Ecology as Teacher. In *Regenerative-Adaptive Design for Sustainable Development*; Springer: 2021; pp. 103–112.
21. Zingoni de Baro, M.E. Two Social-Ecological Design Approaches to Regenerative Sustainability. In *Regenerating Cities; Cities and Nature*; Springer: 2022; pp. 61–96.
22. Zingoni de Baro, M.E. An Integrated Framework for Designing Regenerative Sustainable Urban Environments. In *Regenerating Cities; Cities and Nature*; Springer: 2022; pp. 97–116.
23. Zingoni de Baro, M.E.; Macedo, J. The role of regenerative design and Biophilic urbanism in regional sustainability. The case of Curitiba. In *Bioregional Planning and Design: Volume II*, Fanfani, D., Mataran Ruiz, A., Eds.; Springer: 2020; Volume II, pp. 225–241.

### Subset 3- Google Scholar references (experts – influential authors)

1. Benne, B.; Mang, P. Working regeneratively across scales—Insights from nature applied to the built environment. *Journal of Cleaner Production* **2015**, *109*, 42–52, doi:https://doi.org/10.1016/j.jclepro.2015.02.037.
2. Berkes, F.; Colding, J.; Folke, C. Rediscovery of traditional ecological knowledge as adaptive management. *Ecological applications* **2000**, *10*, 1251–1262, doi:https://doi.org/10.1890/1051-0761(2000)010[1251:ROTEKA]2.0.CO;2.
3. Cole, R.J. Transitioning from green to regenerative design. *Building Research & Information* **2012**, *40*, 39–53, doi:https://doi.org/10.1080/09613218.2011.610608.
4. Cole, R.J.; Busby, P.; Guenther, R.; Briney, L.; Blaviesciunaite, A.; Alencar, T. A regenerative design framework: setting new aspirations and initiating new discussions. *Building Research & Information* **2012**, *40*, 95–111, doi:https://doi.org/10.1080/09613218.2011.616098.
5. Cole, R.J.; Oliver, A.; Robinson, J. Regenerative design, socio-ecological systems and co-evolution. *Building Research & Information* **2013**, *41*, 237–247, doi:https://doi.org/10.1080/09613218.2013.747130.
6. Du Plessis, C. Understanding cities as social-ecological systems. In Proceedings of the World Sustainable Building Conference, Melbourne, (21–25 September), 2008; p. 9.
7. Du Plessis, C. Towards a regenerative paradigm for the built environment. *Building Research & Information* **2012**, *40*, 7–22, doi:https://doi.org/10.1080/09613218.2012.628548.
8. Du Plessis, C.; Brandon, P. An ecological worldview as basis for a regenerative sustainability paradigm for the built environment. *Journal of Cleaner Production* **2015**, *109*, 53–61, doi:https://doi.org/10.1016/j.jclepro.2014.09.098.
9. Hes, D.; Stephan, A.; Moosavi, S. Putting Regenerative Development into Action: Understanding the Decision Making Process of a 680 Hectare Regenerative Project. In Proceedings of the World Sustainable Built Environment Conference, Hong Kong, (5–7 June 2017); p. 9.
10. Mang, P.; Reed, B. Designing from place: a regenerative framework and methodology. *Building Research & Information* **2012**, *40*, 23–38, doi:10.1080/09613218.2012.621341.
11. Pedersen Zari, M. Biomimetic approaches to architectural design for increased sustainability. In Proceedings of the SB07 NZ sustainable building conference, Auckland, New Zealand (14–16 November 2007); pp. 1–10.
12. Pedersen Zari, M. An architectural love of the living: Bio-inspired design in the pursuit of ecological regeneration and psychological wellbeing. *WIT Transactions on Ecology and the Environment* **2009**, *120*, 293–302, doi:10.2495/SDP090291.
13. Pedersen Zari, M. Regenerative design for the future. *Build* **2010**, *115*, 68–69.
14. Pedersen Zari, M. Biomimetic design for climate change adaptation and mitigation. *Architectural Science Review* **2010**, *53*, 172–183, doi:https://doi.org/10.3763/asre.2008.0065.
15. Pedersen Zari, M. Ecosystem services analysis for the design of regenerative built environments. *Building Research & Information* **2012**, *40*, 54–64, doi:https://doi.org/10.1080/09613218.2011.628547.
16. Pedersen Zari, M. Ecosystem services analysis: Mimicking ecosystem services for regenerative urban design. *International journal of sustainable built environment* **2015**, *4*, 145–157, doi:https://doi.org/10.1016/j.ijse.2015.02.004.
17. Pedersen Zari, M.; Jenkin, S. Re-defining cutting edge sustainable design: from eco-efficiency to regenerative development. In Proceedings of the Sustainable Building Conference (SB10), Wellington, New Zealand, (26–28 May 2010).
18. Pedersen Zari, M.; Storey, J. An ecosystem based biomimetic theory for a regenerative built environment. In Proceedings of the Sustainable Building Conference 07, Lisbon, Portugal, (8–9 March 2007).
19. Plaut, J.; Dunbar, B.; Gotthelf, H.; Hes, D. Regenerative development through LENSES with a case study of Seacombe West. *Environment Design Guide* **2016**, 1–19.
20. Plaut, J.M.; Dunbar, B.; Wackerman, A.; Hodgins, S. Regenerative design: the LENSES Framework for buildings and communities. *Building Research & Information* **2012**, *40*, 112–122, doi:https://doi.org/10.1080/09613218.2012.619685.
21. Reed, B. Shifting from ‘sustainability’ to regeneration. *Building Research & Information* **2007**, *35*, 674–680, doi:https://doi.org/10.1080/09613210701475753.
22. Svec, P.; Berkebile, R.; Todd, J.A. REGEN: Toward a tool for regenerative thinking. *Building Research & Information* **2012**, *40*, 81–94, Doi: HTTPs://doi.org/10.1080/09613218.2012.629112.

## Journal Categories and Names with number of articles in final dataset

| Journal categories (and names)           | Primary Database Articles |          |          |           | GS<br>2018-22 | GS<br>experts |
|------------------------------------------|---------------------------|----------|----------|-----------|---------------|---------------|
|                                          | SUBSET 1                  |          |          |           | SUBSET 2      | SUBSET 3      |
|                                          | ProQ                      | WoS      | EBSCO    | Scopus    |               |               |
| <b>Built Environment sector</b>          |                           |          |          |           |               |               |
| Architectural Design                     | 1                         | -        | -        | -         | -             | -             |
| Architectural Science Review             | -                         | -        | -        | -         | -             | 1             |
| Build (magazine)                         | -                         | -        | -        | -         | -             | 1             |
| Building Research & information          | -                         | 2        | -        | 1         | 1             | 9             |
| Cidades. Comunidades e Territorios       | -                         | -        | -        | -         | 1             | -             |
| Cities                                   | -                         | 1        | -        | -         | -             | -             |
| Landscape and Urban Planning             | -                         | 2        | -        | 1         | -             | -             |
| Techne                                   | -                         | -        | -        | 1         | -             | -             |
| <b>22 Sub-totals</b>                     | <b>1</b>                  | <b>5</b> | <b>0</b> | <b>3</b>  | <b>2</b>      | <b>11</b>     |
| <b>Sustainability</b>                    |                           |          |          |           |               |               |
| International Journal of SBEs            | -                         | -        | -        | -         | -             | 1             |
| Sustainability                           | -                         | -        | -        | -         | 6             | -             |
| Sustainability Science                   | -                         | -        | -        | -         | 1             | -             |
| Sustainable Cities and Society           | -                         | -        | -        | 1         | 1             | -             |
| Sustainable Development                  | -                         | -        | -        | -         | 1             | -             |
| Environ, Development & Sustainability    | -                         | 1        | -        | -         | -             | -             |
| <b>12 Sub-totals</b>                     | <b>0</b>                  | <b>1</b> | <b>0</b> | <b>1</b>  | <b>9</b>      | <b>1</b>      |
| <b>Ecology, Biology, Environment</b>     |                           |          |          |           |               |               |
| Biomimetics                              | -                         | -        | -        | 1         | 1             | -             |
| BioScience                               | 2                         | -        | -        | -         | -             | -             |
| Ecological Applications                  | -                         | -        | -        | -         | -             | 1             |
| Ecological Indicators                    | --                        | -        | -        | -         | 1             | -             |
| Environmental Design Guide               | -                         | -        | -        | -         | -             | 1             |
| Environmental Science and Pollution      | -                         | -        | -        | 1         | -             | -             |
| International Journal of EcoDynamics*    | -                         | -        | -        | 1         | -             | -             |
| <b>9 Sub-totals</b>                      | <b>2</b>                  | <b>0</b> | <b>0</b> | <b>3</b>  | <b>2</b>      | <b>2</b>      |
| <b>Environmental Management</b>          |                           |          |          |           |               |               |
| Foresight                                | -                         | -        | -        | -         | 2             | -             |
| Journal of Cleaner Production            | -                         | -        | -        | -         | 1             | 2             |
| Journal of Enviro Acc & Management       | -                         | -        | -        | 1         | -             | -             |
| Journal of Environmental Management      | -                         | -        | 1        | -         | -             | -             |
| Journal of Enviro M-ment & Planning      | -                         | -        | 1        | -         | -             | -             |
| Journal of Urban Management              | -                         | -        | -        | 1         | -             | -             |
| WIT Transactions on Ecology & Enviro     | -                         | -        | -        | -         | -             | 1             |
| <b>10 Sub-totals</b>                     | <b>0</b>                  | <b>0</b> | <b>2</b> | <b>2</b>  | <b>3</b>      | <b>3</b>      |
| <b>Social Issues</b>                     |                           |          |          |           |               |               |
| Alternatives Journal                     | -                         | -        | -        | 1         | -             | -             |
| Australian Journal of Enviro Education   | -                         | -        | -        | -         | 1             | -             |
| Journal of Socialist Ecology             | -                         | -        | -        | 1         | -             | -             |
| Environmental Ethics                     | -                         | -        | 1        | -         | -             | -             |
| Local Enviro. (Justice & Sustainability) | -                         | -        | -        | 1         | -             | -             |
| Global Environmental Change              | -                         | -        | 1        | -         | -             | -             |
| <b>6 Sub-totals</b>                      | <b>0</b>                  | <b>0</b> | <b>2</b> | <b>3</b>  | <b>1</b>      | <b>0</b>      |
| <b>8 Book chapters</b>                   | <b>0</b>                  | <b>1</b> | <b>0</b> | <b>1</b>  | <b>6</b>      | <b>0</b>      |
| <b>8 Conference Proceedings</b>          | <b>0</b>                  | <b>0</b> | <b>0</b> | <b>3</b>  | <b>0</b>      | <b>5</b>      |
| <b>TOTAL</b>                             | <b>3</b>                  | <b>7</b> | <b>4</b> | <b>16</b> | <b>23</b>     | <b>22</b>     |
